# Supplementary material
Source: PubMed Central journal article supplement (PMC8889458)
Supplement: jama-e220744-s001.pdf [file jama-e220744-s001.pdf]

## Supplemental Online Content

Howard R, Thumma J, Ehlers A, Englesbe M, Dimick J, Telem D. Reoperation for recurrence up to 10 years after hernia repair. *JAMA*. doi:10.1001/jama.2022.0744

**eMethods.** Race and Ethnicity Use in Medicare Claims Database

**eTable 1.** ICD-9/10 and CPT codes used to identify index hernia repair operation

**eTable 2.** 29 Elixhauser Comorbidities

**eReferences**

This supplemental material has been provided by the authors to give readers additional information about their work.

**eMethods.** Race and Ethnicity Use in Medicare Claims Database

Patient race and ethnicity are included as identifiers in the Medicare claims database used for this study.<sup>1</sup> These identifiers were the following fixed categories, which are standard to Medicare data: Asian, Black, Hispanic, North American Native, White, other race/ethnicity, and unknown race/ethnicity. No additional information is available in Medicare claims data regarding the composition of the “other race” category. Those categories were used to identify patient race and ethnicity in this study. Race and ethnicity were included as they have been found to be associated with the presentation, management, and outcomes of hernias and hernia repair.<sup>2-4</sup>

**eTable 1.** ICD-9/10 and CPT codes used to identify index hernia repair operation<sup>a</sup>

|                               |                                                                                                            |
|-------------------------------|------------------------------------------------------------------------------------------------------------|
| <b>ICD-9 Diagnosis Codes</b>  | 551.1, 551.2, 551.21, 551.29, 552.1, 552.2, 552.21, 552.29, 553.1, 553.2, 553.21, 553.29                   |
| <b>ICD-10 Diagnosis Codes</b> | K42, K42.0, K42.1, K42.9, K43, K43.0, K43.1, K43.2, K43.6, K43.7, K43.9                                    |
| <b>ICD-9 Procedure Codes</b>  | 53.4, 53.41, 53.42, 53.43, 53.49, 53.5, 53.51, 53.59, 53.6, 53.61, 53.63, 53.69                            |
| <b>ICD-10 Procedure Codes</b> | 0WQF0ZZ, 0WMF0ZZ, 0WQF0ZZ, 0WQF3ZZ, 0WQF4ZZ, 0WQFXZZ, 0WUF07Z, 0WUF0JZ, 0WUF0KZ, 0WUF47Z, 0WUF4JZ, 0WUF4KZ |
| <b>CPT Codes</b>              | 49560, 49561, 49585, 49587, 49652, 49653, 49654, 49655, 49570, 49572                                       |

ICD-9: International Classification of Diseases 9<sup>th</sup> Edition; ICD-10: International Classification of Diseases 10<sup>th</sup> Edition; CPT: Current Procedural Terminology.

<sup>a</sup>Reoperations were identified using the same codes, in addition to 4 additional CPT codes excluded from the index operation that specifically identify recurrent hernia repair: 49565, 49566, 49656, 49657.

**eTable 2.** 29 Elixhauser Comorbidities

|                                                      |
|------------------------------------------------------|
| Acquired immunodeficiency syndrome                   |
| Alcohol abuse                                        |
| Chronic blood loss anemia                            |
| Chronic pulmonary disease                            |
| Coagulopathy                                         |
| Congestive heart failure                             |
| Deficiency anemias                                   |
| Depression                                           |
| Diabetes with chronic complications                  |
| Diabetes without chronic complications               |
| Drug abuse                                           |
| Fluid and electrolyte disorders                      |
| Hypertension                                         |
| Hypothyroidism                                       |
| Liver disease                                        |
| Lymphoma                                             |
| Metastatic cancer                                    |
| Obesity                                              |
| Other neurological disorders                         |
| Paralysis                                            |
| Peptic ulcer disease with bleeding                   |
| Peripheral vascular disease                          |
| Psychoses                                            |
| Pulmonary circulation disease                        |
| Renal failure                                        |
| Rheumatoid arthritis and collagen vascular disorders |
| Solid tumor without metastasis                       |
| Valvular disease                                     |
| Weight loss                                          |

The 29 Elixhauser comorbidities that were used in the Cox proportional hazards model.<sup>5</sup>

## eReferences

1. Race/ethnicity (from Medicare EDB) | ResDAC. Resdac.org. Published 2022. Accessed January 13, 2022. <https://resdac.org/cms-data/variables/raceethnicity-medicare-edb>.
2. Bowman K, Telem DA, Hernandez-Rosa J, Stein N, Williams R, Divino CM. Impact of race and socioeconomic status on presentation and management of ventral hernias. *Arch Surg*. 2010;145(8):776-780.
3. Vu JV, Gunaseelan V, Dimick JB, Englesbe MJ, Campbell DA, Jr., Telem DA. Mechanisms of age and race differences in receiving minimally invasive inguinal hernia repair. *Surg Endosc*. 2019;33(12):4032-4037.
4. Asolati M, Huerta S, Sarosi G, Harmon R, Bell C, Anthony T. Predictors of recurrence in veteran patients with umbilical hernia: single center experience. *Am J Surg*. 2006;192(5):627-630.
5. Elixhauser A, Steiner C, Harris DR, Coffey RM. Comorbidity measures for use with administrative data. *Medical care*. 1998;36(1):8-27.
